# Supplementary material for: Clinical and Experimental Determination of Protection Afforded by BCG Vaccination against Infection with Non-Tuberculous Mycobacteria: A Role in Cystic Fibrosis?
Source: MDPI journal article supplement (doi:10.3390/vaccines11081313), 2023-08-01
Supplement: s1 [file s1]

## Supporting Information

### Clinical and experimental determination of protection afforded by BCG vaccination against infection with non-tuberculous mycobacteria: a role in Cystic Fibrosis?

Warner *et. al.*

**Supplementary Table S1. Monoclonal antibodies used for CD4<sup>+</sup> T cell analysis.**

| Marker         | Clone     | Fluorochrome | Dilution | Manufacturer  |
|----------------|-----------|--------------|----------|---------------|
| B220           | PA3-6B2   | PerCP/Cy5.5  | 1 in 200 | BD Pharmingen |
| CD4            | RM4-5     | AF700        | 1 in 200 | BD Pharmingen |
| CD44           | IM7       | PE/Cy7       | 1 in 300 | BD Pharmingen |
| CD62L          | MEL-14    | PE           | 1 in 300 | BioLegend     |
| CD8a           | 53-6.7    | APC-Cy7      | 1 in 200 | BD Pharmingen |
| FcRIII/II      | 2.4G2     | NA           | 1 in 200 | BD Pharmingen |
| KLRG-1         | 2F1/KLRG1 | FITC         | 1 in 300 | BioLegend     |
| Ror $\gamma$ T | Q31-378   | PECF594      | 1 in 200 | BD Horizon    |
| Tbet           | 4B10      | APC          | 1 in 200 | BioLegend     |

**Supplementary Table S2. Monoclonal antibodies used to assess antigen-specific cytokine production.**

| Marker       | Clone      | Fluorochrome | Dilution | Manufacturer    |
|--------------|------------|--------------|----------|-----------------|
| CD4          | RM4-5      | AF700        | 1 in 200 | BD Pharmingen   |
| CD44         | IM7        | FITC         | 1 in 300 | BD Pharmingen   |
| CD8a         | 53-6.7     | APC-Cy7      | 1 in 200 | BD Pharmingen   |
| FcRIII/II    | 2.4G2      | NA           | 1 in 200 | BD Pharmingen   |
| IFN $\gamma$ | XMG1.2     | PE/Cy7       | 1 in 300 | BD Pharmingen   |
| IL-17        | TC11-18H10 | Pacific Blue | 1 in 200 | BD Horizon      |
| IL-2         | JES6-5H4   | PE           | 1 in 200 | Miltenyi Biotec |
| TNF          | MP6-XT22   | PerCP/Cy5.5  | 1 in 200 | BD Pharmingen   |

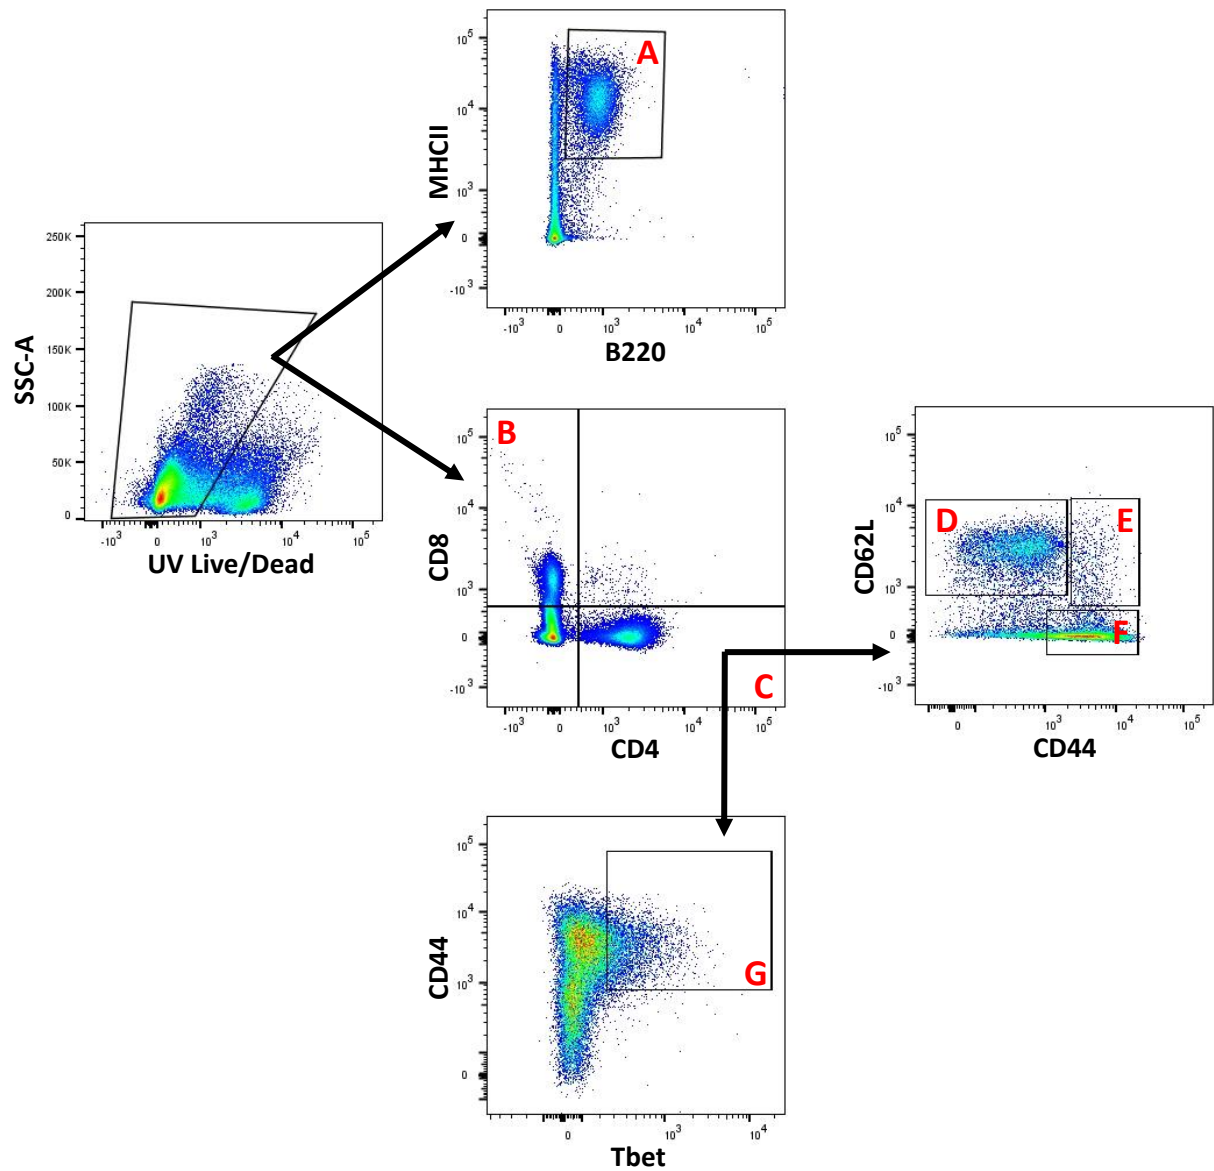

**Supplementary Figure S1.** Gating strategy for expression of cytokines and transcription factors by CD4<sup>+</sup> T cells
